# Supplementary material for: Nanosheet-Facilitated Spray Delivery of dsRNAs Represents a Potential Tool to Control Rhizoctonia solani Infection
Source: MDPI journal article supplement (doi:10.3390/ijms232112922), 2022-10-26
Supplement: s1 [file s1]

## Supplemental materials

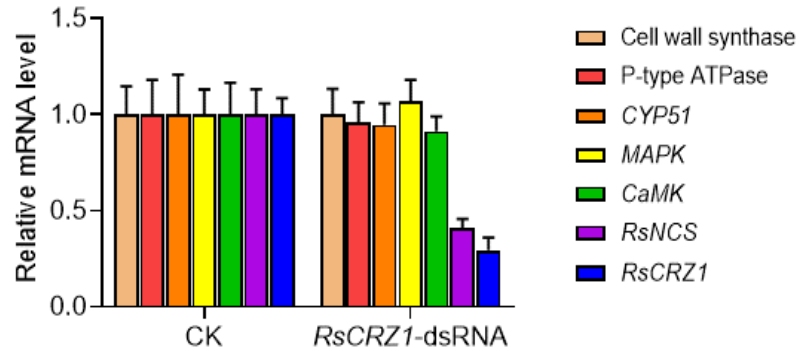

**Figure S1. Expression levels of *RsCRZ1* and its downstream genes in *R. solani* after co-incubation with *RsCRZ1*-dsRNA.** RT-qPCR were performed to detect RNA levels for *RsCRZ1* and downstream genes, such as cell wall synthase gene, P-type ATPase gene, *CYP51*, *MAPK*, *CaMK* and *RsNCS*, in *R. solani* which was co-incubated with *RsCRZ1*-dsRNA for 48 hours.

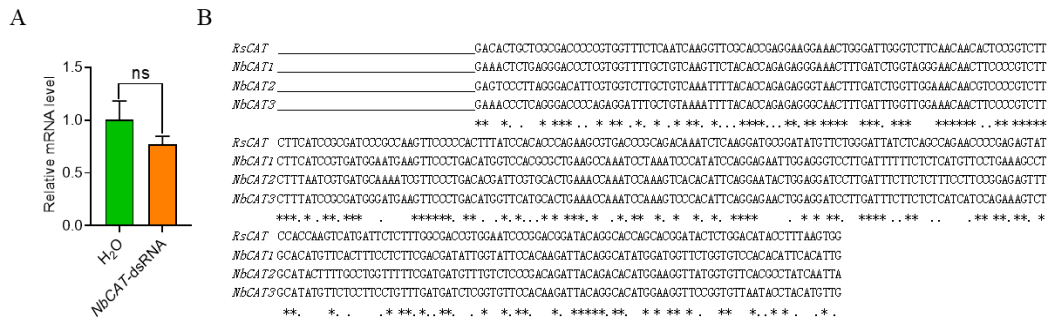

**Figure S2. Expression levels of *NbCAT* genes in tobacco sprayed with *RsCAT*-dsRNA and their homologies with *RsCAT*.** (A) Expression levels of *NbCAT1*, *NbCAT2* and *NbCAT3* in tobacco 48 h after spraying with *RsCAT*-dsRNA. ns, no significant differences (B) Sequences comparison of *RsCAT*, *NbCAT1*, *NbCAT2* and *NbCAT3*. \* indicates identical nucleotide.

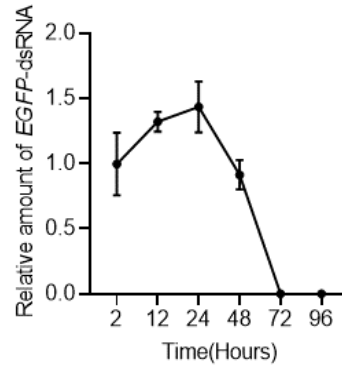

**Figure S3. Detection of exogenous EGFP-dsRNA in the maize leaves at the different times after spray.** EGFP-dsRNA in RNA samples collected at different time points was detected by RT-qPCR.

**Table S1. Primers used to product dsRNA targeting different genes.**

| Name                 | Sequence (5' → 3')                          |
|----------------------|---------------------------------------------|
| <i>EGFP</i> -dsF     | cacatgaagcagcagcactt                        |
| <i>EGFP</i> -dsR     | gttcaccttgatgccgttctt                       |
| <i>EGFP</i> -dsT7F   | taatacgactcactatagggcacatgaagcagcagcactt    |
| <i>EGFP</i> -dsT7R   | taatacgactcactataggggttcaccttgatgccgttctt   |
| <i>RsCAT</i> -dsF    | gacactgctcgcgaccc                           |
| <i>RsCAT</i> -dsR    | ccacttaaaggatgtccagagt                      |
| <i>RsCAT</i> -dsT7F  | taatacgactcactataggggacactgctcgcgaccc       |
| <i>RsCAT</i> -dsT7R  | taatacgactcactatagggccacttaaaggatgtccagagt  |
| <i>RsCRZ1</i> -dsF   | gctcgttctgtcggagatg                         |
| <i>RsCRZ1</i> -dsR   | ctcatgtcgcttgagtcagtc                       |
| <i>RsCRZ1</i> -T7dsF | taatacgactcactataggggctcgttctgtcggagatg     |
| <i>RsCRZ1</i> -T7dsR | taatacgactcactatagggctcatgtcgcttgagtcagtc   |
| <i>RsPG1</i> -dsF    | cgggaaagggtatcacattcaa                      |
| <i>RsPG1</i> -dsR    | ggttcgagatgctgtaggtatg                      |
| <i>RsPG1</i> -dsT7F  | taatacgactcactatagggcgaggaaagggtatcacattcaa |
| <i>RsPG1</i> -dsT7R  | taatacgactcactataggggggttcgagatgctgtaggtatg |

Table S2. Primers used to qRT-PCR detection.

|                     |                         |
|---------------------|-------------------------|
| q <i>EGFP</i> -R    | ccgaccactaccagcagaacac  |
| q <i>EGFP</i> -R    | tcacgaactccagcaggaccat  |
| q <i>RsCAT</i> -F   | ccacattgacctctcgctcac   |
| q <i>RsCAT</i> -R   | gatggcagcacggcagatgtt   |
| q <i>RsCRZI</i> -F  | tctcggtcaaacgggtctctc   |
| q <i>RsCRZI</i> -R  | ttccgctccctgttcgctcat   |
| q <i>RsGAPDH</i> -F | tgttggtggcgtgaacttgattc |
| q <i>RsGAPDH</i> -R | gcaccgtagtcatcaaaccctca |
| q <i>RsNCS</i> -F   | cgaggaagccgaatacagagagc |
| q <i>RsNCS</i> -R   | actgcatcgagcgaacagagga  |
| q <i>RsPGIF</i>     | ggatggtcagggcggtaatgga  |
| q <i>RsPGIR</i>     | tgtaggtatgtgcgggcgagtt  |
| q <i>ZmUBQ9</i> -F  | tgcggtgcgggtgtcttcat    |
| q <i>ZmUBQ9</i> -R  | tgcttgataggtaggcgggtga  |
